# Supplementary material for: The Wzi outer membrane protein mediates assembly of a tight capsular polysaccharide layer on the Acinetobacter baumannii cell surface
Source: PubMed Central journal article supplement (PMC8571296; doi:10.1038/s41598-021-01206-5), 2021-11-05
Supplement: 41598_2021_1206_MOESM1_ESM.pdf [file 41598_2021_1206_MOESM1_ESM.pdf]

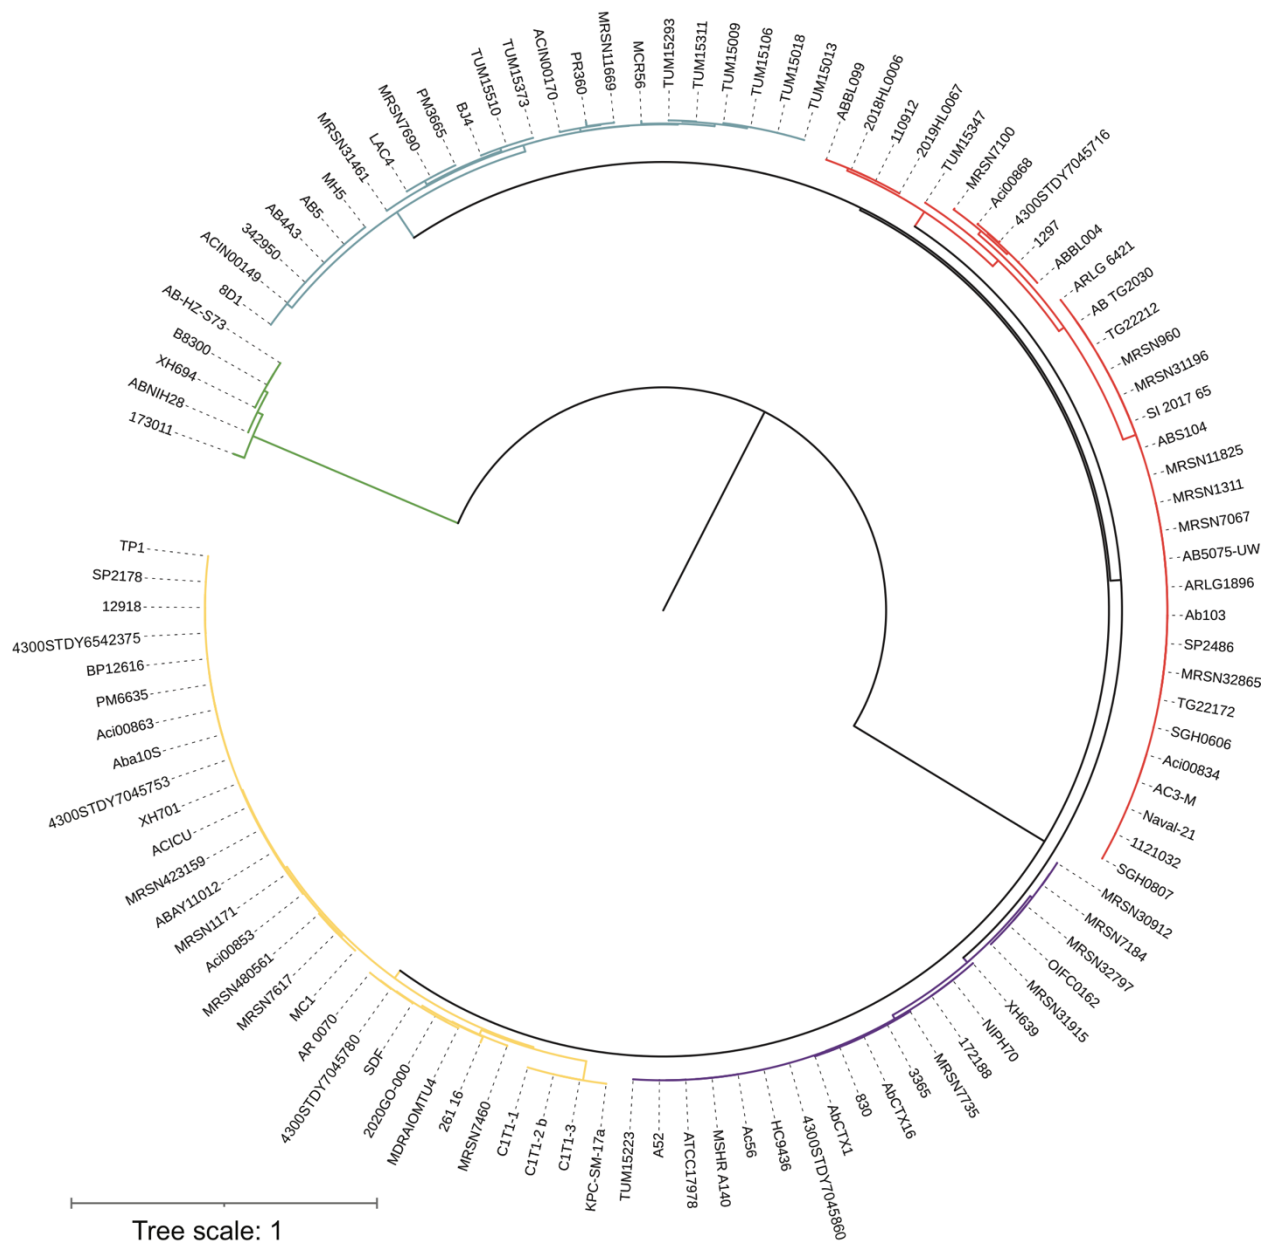

**Figure S1.** Maximum likelihood tree of *wzi* nucleotide sequences from 109 *A. baumannii* genome assemblies. Tree is based on 1000 replicate trees constructed using RAxML v 8.0.0 with the GTRGAMMA model and visualised in iTOL. Bootstrap values are not shown. Tree scale is below. Major phylogeny clades indicating *wzi* types are coloured differently. Assembly accession numbers are listed in Supplementary Table S1.

|       |                                                                                                                             |               |
|-------|-----------------------------------------------------------------------------------------------------------------------------|---------------|
| Type4 | MFLRKTL <sup>S</sup> IALLATASSAVFAQGLVLNDDLR <sup>T</sup> DLNWL <sup>N</sup> QQGVINIST <sup>S</sup> TWPLSGDEIQ <sup>R</sup> | 60            |
| Type1 | MFLRKTL <sup>S</sup> IALLATASSAVFAQGLVLNDDLR <sup>T</sup> DLNWL <sup>N</sup> QQGVISIST <sup>S</sup> TWPLSGDEIQ <sup>R</sup> | 60            |
| Type2 | MFLRKTL <sup>S</sup> IALLATASSAVFAQGLVLNDDLR <sup>T</sup> DLNWL <sup>N</sup> QQGVINIST <sup>S</sup> TWPLSGDEIQ <sup>R</sup> | 60            |
| Type3 | MFLRKTL <sup>S</sup> IALLATASSAVFAQGLVLNDDLR <sup>T</sup> DLNWL <sup>N</sup> QQGVINIST <sup>S</sup> TWPLSGDEIQ <sup>R</sup> | 60            |
|       | <b>Loop 1</b>                                                                                                               |               |
| Type4 | ALSQAKVTHPAQQKVINSVLNALKADND <sup>T</sup> VKVGAF <b>AETDIKNI</b> PQAFGDNQKSQYQGSLE                                          | 120           |
| Type1 | ALSQAKVTHPAQQKVINSVLNALKADND <sup>T</sup> VKVGAF <b>AETDIKNI</b> PQAFGDNQKAQYQGSLE                                          | 120           |
| Type2 | ALSQAKVTHPAQQKVINSVLNALKADND <sup>T</sup> VKVGAF <b>AESDIKNI</b> PQAFGDNQKSQYQGSLE                                          | 120           |
| Type3 | ALSQAKVTHPAQQKVINSVLNALKADND <sup>T</sup> VKVGAF <b>AETDIKNI</b> PQAFGDNQKSQYQGSLE                                          | 120           |
|       | <b>Loop 2</b>                                                                                                               | <b>Loop 3</b> |
| Type4 | FNAGGENWDAKIRVNAEK <b>DPQIDSGHDV</b> NEGSYVAGKLNQWL <b>VAGQIP</b> TWWGPGHDGS                                                | 180           |
| Type1 | FNAGGENWDAKIRVNAEK <b>DPQIDSGHDV</b> NEGSYVAGKLNQW <b>IVAGQIP</b> TWWGPGHDGS                                                | 180           |
| Type2 | FNAGGENWDAKIRVNAEK <b>DPQIDSGHDV</b> NEGSYVAGKLNQW <b>IVAGQIP</b> TWWGPGHDGS                                                | 180           |
| Type3 | FNAGGENWDAKIRVNAEK <b>DPQIDSGHDV</b> NEGSYVAGKLNQWL <b>VAGQIP</b> TWWGPGHDGS                                                | 180           |
|       | <b>Loop 4</b>                                                                                                               |               |
| Type4 | <b>LIRGDASRPV</b> YGV <sup>T</sup> MQRAVQDAFENK <sup>W</sup> LSWIGPWQYQ <b>L</b> FAGQ <b>LDDYKAV</b> PHAKLLGMRVT            | 240           |
| Type1 | <b>LIRGDASRPV</b> YGV <sup>T</sup> AQRAVQNAFET <sup>K</sup> WLSWIGPWQYQAFAGQ <b>LDDYKAV</b> PDAKLI <sup>G</sup> LRVT        | 240           |
| Type2 | <b>LIRGDASRPV</b> YGV <sup>T</sup> AQRAVQNAFET <sup>K</sup> WLSWIGPWQYQAFAGQ <b>LDDYKAV</b> PDAKLI <sup>G</sup> LRLT        | 240           |
| Type3 | <b>LIRGDASRPV</b> YGV <sup>T</sup> AQRAVQNAFET <sup>K</sup> WLSWIGPWQYQAFAGQ <b>LDDYKAV</b> PHAKLL <sup>G</sup> LRLT        | 240           |
|       | <b>Loop 5</b>                                                                                                               |               |
| Type4 | ARVP <b>PALEIGASRAIQIGDGPDSFKAYW</b> NAVIGK <b>DN</b> GC <b>TENS</b> CVGEDNAS <b>N</b> QLAGFDA                              | 300           |
| Type1 | AQPLPYIELGASRAIQ <b>WGDGRPELS</b> SLWDAFVGNK----DNGGT <b>GE</b> PDPS <b>N</b> QIAGFDG                                       | 296           |
| Type2 | AQPLPYLELGASRTIQ <b>WGDGRSE</b> SF <b>SS</b> LWDAIK <b>GN</b> ----NVYGD <b>TEN</b> PS <b>N</b> QLAGFDG                      | 295           |
| Type3 | ARPLPYLELGASRTLQ <b>WGEGRSE</b> SWD <b>SL</b> WNAIK <b>GN</b> ----NVYD <b>S</b> -DEDR <b>S</b> NQIAGFDA                     | 295           |
|       | <b>Loop 5</b>                                                                                                               |               |
| Type4 | RLQLQPLFNIPVSVYGYIG <b>DEAGGLPSK</b> KMYLAGADYSSMINMPYQIYA <b>E</b> WAD <b>TRTN</b>                                         | 360           |
| Type1 | RLLQPLFQVPVSLYGYV <b>GEDEAGGLPSK</b> KMYLAGVDYSSSYNNMPYQLYA <b>E</b> WAD <b>TRTN</b>                                        | 356           |
| Type2 | RLLQPLLNIPVSLYGYV <b>GEDEAGYLP</b> SKKMYLAGVDYSSSYNDMPYQLYA <b>E</b> WAD <b>TRTN</b>                                        | 355           |
| Type3 | RLNLQSLINAPVGIYGYV <b>GEDEAGLLP</b> SKKMYLAGVDYSSSYNNMPYQLYA <b>E</b> WAD <b>TRTN</b>                                       | 355           |
|       | <b>Loop 7</b>                                                                                                               |               |
| Type4 | <b>GD</b> IRGISY <b>NH</b> HQYTDGY <b>YQHGYPLGHAMGGD</b> QMYSVGGDIRFDV <b>M</b> NRLS <b>G</b> RAMV <b>V</b> KV <b>NQ</b>    | 420           |
| Type1 | <b>GD</b> VRGISY <b>AH</b> STYKDGYY <b>QHGYPLGHAMGGD</b> QMYSVGGDIRFDV <b>M</b> NRLS <b>G</b> RAMV <b>V</b> KV <b>NQ</b>    | 416           |
| Type2 | <b>GD</b> VKISY <b>TH</b> SVYKDGYY <b>QHGFPLGHAMGGD</b> QMYSVGGDIRFDV <b>M</b> NRLS <b>G</b> RAMV <b>V</b> KV <b>NQ</b>     | 415           |
| Type3 | <b>ND</b> VKGISY <b>NH</b> YVYKDGYY <b>QHGFPLGHAMGGD</b> QMYSVGGDIRFDV <b>M</b> NRLS <b>G</b> RAMV <b>V</b> KV <b>NQ</b>    | 415           |
|       | <b>Loop 8</b>                                                                                                               | <b>Loop 9</b> |
| Type4 | <b>SNLAIN</b> KAFPKDYEIKALD <b>L</b> TWTHFIK <b>P</b> DLPLKINGW <b>VSDS</b> LE <b>G</b> NDAGASIGIEI <b>P</b> LER            | 480           |
| Type1 | <b>SNLAIN</b> KAFPKDDEIKALD <b>L</b> TWTHFIK <b>P</b> DLPLKINGW <b>VSDS</b> LE <b>G</b> NDAGASIGIEI <b>P</b> LER            | 476           |
| Type2 | <b>SNLAIN</b> KAFPKDDEIKALD <b>L</b> TWTHYIK <b>P</b> DLPLKINGW <b>VSDS</b> LE <b>G</b> NDAGASIGIEI <b>P</b> LER            | 475           |
| Type3 | <b>SNLAIN</b> KAFPKDDEIKALD <b>L</b> TWTHYIK <b>P</b> DLPLKINGW <b>VSDS</b> LE <b>G</b> NDAGASIGIEI <b>P</b> LER            | 475           |
| Type4 | KMFGF 485                                                                                                                   |               |
| Type1 | KMFGF 481                                                                                                                   |               |
| Type2 | KMFGF 480                                                                                                                   |               |
| Type3 | ----- 480                                                                                                                   |               |

**Figure S2.** Multiple sequence alignment of the four main Wzi sequence types. Alignment constructed by CLUSTAL Omega (<https://www.ebi.ac.uk/Tools/msa/clustalo/>). Representative types are: Type 1 = AB5075-UW (ABUW\_2898 in CP008706.1), type 2 = ATCC17978 (AUO97\_12210 in CP018664.1), type 3 = ACICU (DMO12\_03033 in CP031380.1), type 4 = LAC4 (BBX32\_12830 in CP018677.1). Bold face indicates loops identified by structural comparison to *E. coli* K30 Wzi in Fig. 7, with red indicating loops identified in *E. coli* that may interact with the CPS.

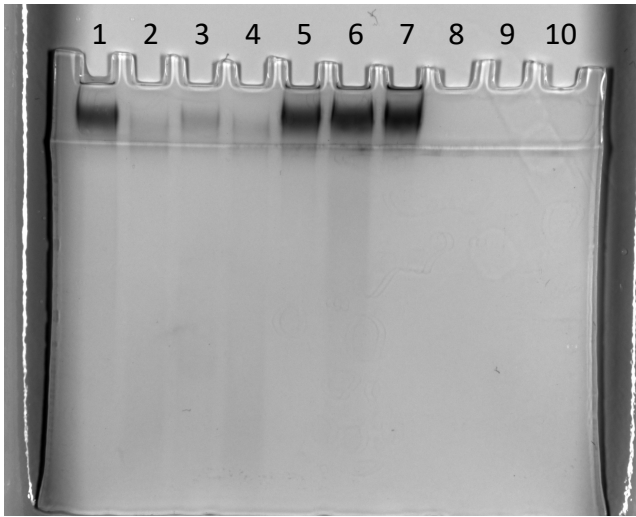

| Gel 1 |                                                                    |
|-------|--------------------------------------------------------------------|
| Lane  | Sample                                                             |
| 1     | AB5075 WT, attached CPS, 6 OD equiv.                               |
| 2     | <i>wzi</i> ::T26-1, attached CPS, 6 OD equiv.                      |
| 3     | <i>wzi</i> ::T26-2, attached CPS, 6 OD equiv.                      |
| 4     | <i>wzi</i> ::T26-3, attached CPS, 6 OD equiv.                      |
| 5     | <i>wzi</i> ::T26 -1 attTn7- <i>wzi</i> , attached CPS, 6 OD equiv. |
| 6     | <i>wzi</i> ::T26 -2 attTn7- <i>wzi</i> , attached CPS, 6 OD equiv. |
| 7     | <i>wzi</i> ::T26 -3 attTn7- <i>wzi</i> , attached CPS, 6 OD equiv. |
| 8     | Blank                                                              |
| 9     | Blank                                                              |
| 10    | Blank                                                              |

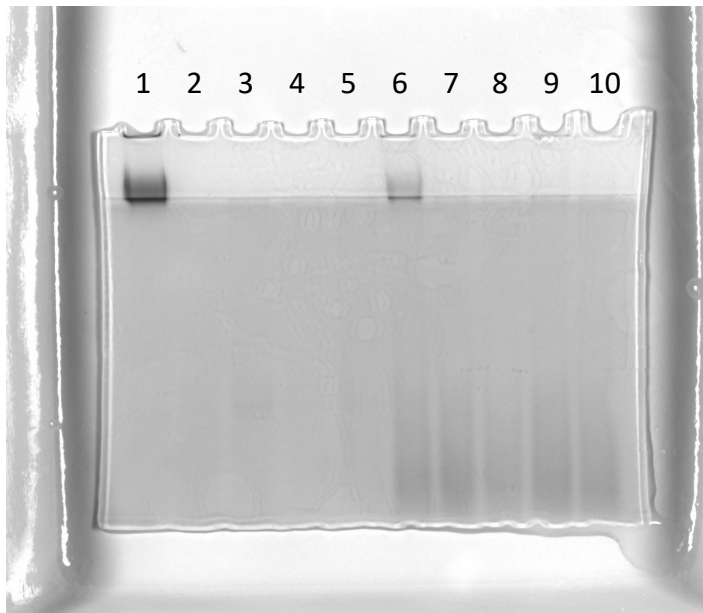

| Gel 2 |                                               |
|-------|-----------------------------------------------|
| Lane  | Sample                                        |
| 1     | AB5075 WT, attached CPS, 6 OD equiv.          |
| 2     | Other sample                                  |
| 3     | <i>itrA1</i> ::T26, attached CPS, 6 OD equiv. |
| 4     | Other sample                                  |
| 5     | Other sample                                  |
| 6     | AB5075 WT, shed CPS, 6 OD equiv.              |
| 7     | Other sample                                  |
| 8     | <i>itrA1</i> ::T26, shed CPS, 6 OD equiv.     |
| 9     | Other sample                                  |
| 10    | Other sample                                  |

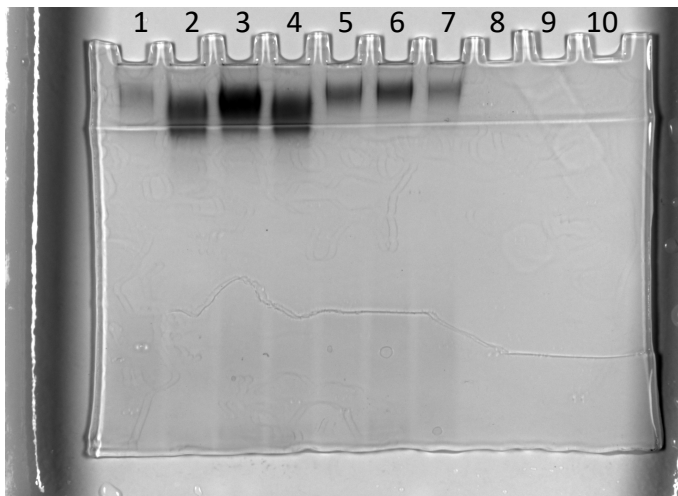

| Gel 3 |                                                                |
|-------|----------------------------------------------------------------|
| Lane  | Sample                                                         |
| 1     | AB5075 WT, shed CPS, 6 OD equiv.                               |
| 2     | <i>wzi</i> ::T26-1, shed CPS, 6 OD equiv.                      |
| 3     | <i>wzi</i> ::T26-2, shed CPS, 6 OD equiv.                      |
| 4     | <i>wzi</i> ::T26-3, shed CPS, 6 OD equiv.                      |
| 5     | <i>wzi</i> ::T26 -1 attTn7- <i>wzi</i> , shed CPS, 6 OD equiv. |
| 6     | <i>wzi</i> ::T26 -2 attTn7- <i>wzi</i> , shed CPS, 6 OD equiv. |
| 7     | <i>wzi</i> ::T26 -3 attTn7- <i>wzi</i> , shed CPS, 6 OD equiv. |
| 8     | Blank                                                          |
| 9     | Blank                                                          |
| 10    | Blank                                                          |

**Figure S3.** Original uncropped SDS-PAGE gels shown in Fig. 2. Samples for each lane are indicated in the adjacent tables. Yellow highlighted lanes are sample shown in Fig. 2.
